# Supplementary material for: Receptor-Targeted Nipah Virus Glycoproteins Improve Cell-Type Selective Gene Delivery and Reveal a Preference for Membrane-Proximal Cell Attachment
Source: PubMed Central journal article supplement (PMC4900575; doi:10.1371/journal.ppat.1005641), 2016-06-09
Supplement: ppat.1005641.s001.pdf [file ppat.1005641.s001.pdf]

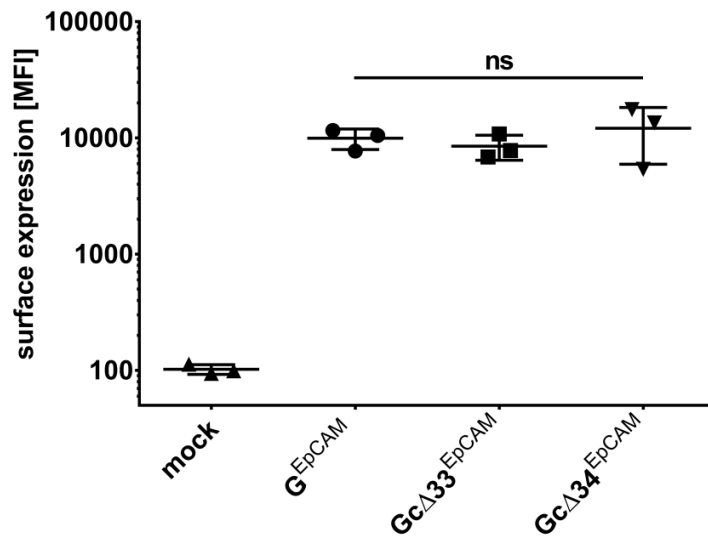

**Figure S1: Scatter dot blot of fluorescence intensities of Fig 1C.** Mean fluorescence intensities of HEK-293T cells transiently transfected with expression plasmids encoding the indicated EpCAM-displaying cytoplasmic tail truncation variants of G compared to mock transfected cells as determined by flow cytometry. Cells were stained with PE-coupled anti-His antibody (n=3; mean  $\pm$  standard deviations (SD) are shown; ns, not significant by one-way ANOVA with Tukey's multiple comparisons test).
