# Supplementary material for: Receptor-Targeted Nipah Virus Glycoproteins Improve Cell-Type Selective Gene Delivery and Reveal a Preference for Membrane-Proximal Cell Attachment
Source: PubMed Central journal article supplement (PMC4900575; doi:10.1371/journal.ppat.1005641), 2016-06-09
Supplement: ppat.1005641.s002.pdf [file ppat.1005641.s002.pdf]

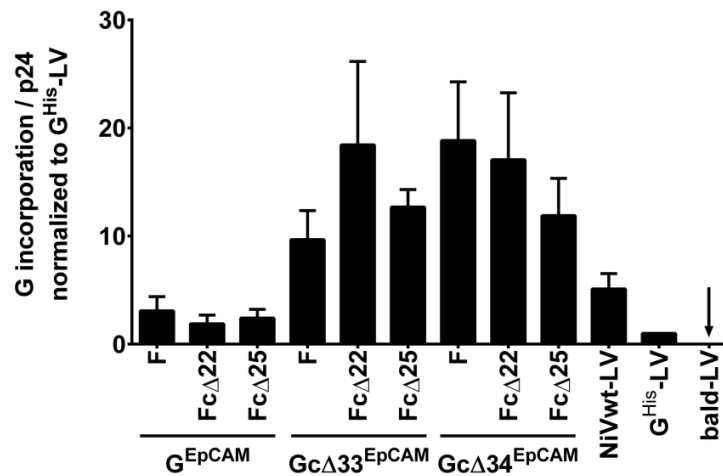

**Figure S2: Quantification of Western blot Fig 1D.** Western blot analysis of LV particles for incorporation of G<sup>EpCAM</sup>, GcΔ33<sup>EpCAM</sup>, and GcΔ34<sup>EpCAM</sup> and the three different F variants (full length F, FcΔ22 and FcΔ25).  $2.5 \times 10^{10}$  particles per sample were applied. NiV-G<sup>His</sup>/F (G<sup>His</sup>-LV) and GcΔ34<sup>His</sup>/FcΔ22 (NiVwt-LV) pseudotyped LVs as well as concentrated supernatant of mock transfected cells (mock) and concentrated supernatant of cells transfected with the *gag/pol* encoding plasmid pCMVΔR8.9 (bald-LV) served as control. Proteins were detected by chemiluminescence. Chemiluminescence values for the glycoprotein G variants were normalized to those of p24. Values are shown relative to that of G<sup>His</sup>-LV. Data are mean values obtained from three independently generated vector stocks for each indicated envelope protein combination (n=3; mean  $\pm$  standard error of the mean (SEM) are shown).
