# Supplementary material for: Receptor-Targeted Nipah Virus Glycoproteins Improve Cell-Type Selective Gene Delivery and Reveal a Preference for Membrane-Proximal Cell Attachment
Source: PubMed Central journal article supplement (PMC4900575; doi:10.1371/journal.ppat.1005641), 2016-06-09
Supplement: ppat.1005641.s003.pdf [file ppat.1005641.s003.pdf]

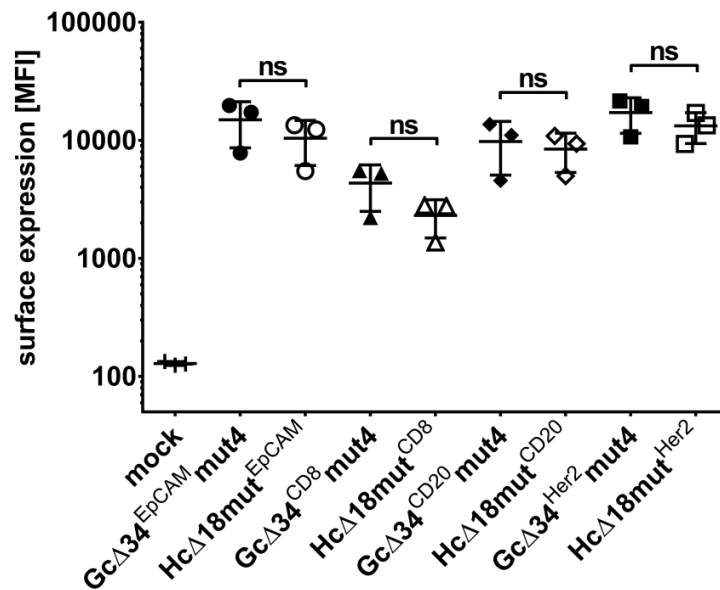

**Figure S3: Scatter dot blot of fluorescence intensities of Fig 5A.** Mean fluorescence intensities of surface expression of NiV G proteins targeted to four different receptors were compared to those of their corresponding MV H protein counterparts. All expression plasmids encoding the different constructs were transfected into HEK-293T cells. Surface expression was analyzed after 48 hours using a His-tag-specific antibody. Mock transfected cells served as negative control (n=3; mean  $\pm$  standard deviations (SD) are shown; ns, not significant by unpaired *t*-test).
