# Supplementary material for: Receptor-Targeted Nipah Virus Glycoproteins Improve Cell-Type Selective Gene Delivery and Reveal a Preference for Membrane-Proximal Cell Attachment
Source: PubMed Central journal article supplement (PMC4900575; doi:10.1371/journal.ppat.1005641), 2016-06-09
Supplement: ppat.1005641.s004.pdf [file ppat.1005641.s004.pdf]

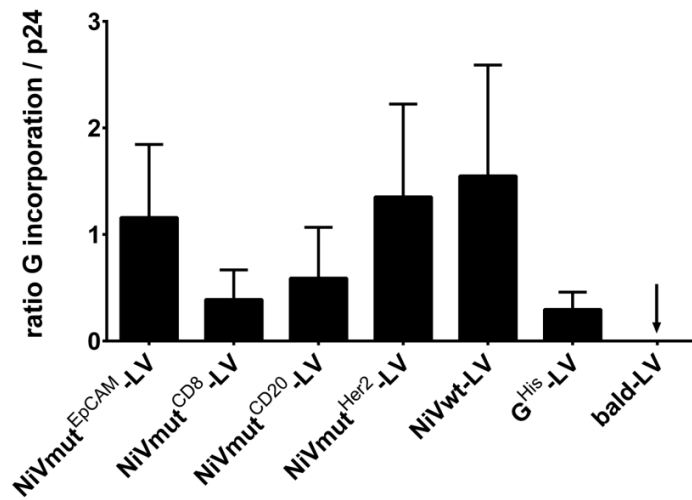

**Figure S4: Quantification of Western blot Fig 5B.** Three independently generated stocks of NiVmut<sup>EpcAM</sup>-LV, NiVmut<sup>CD8</sup>-LV, NiVmut<sup>CD20</sup>-LV, and NiVmut<sup>Her2</sup>-LV, were subjected to Western blot analysis applying  $2.5 \times 10^{10}$  particles per sample, respectively. Stocks prepared from mock transfected cells (mock) as well as stocks containing bald particles without glycoproteins (bald-LV) served as controls. In addition, particles pseudotyped with full-length His-tagged G and AU1 tagged F (G<sup>His</sup>-LV) as well as particles pseudotyped with G $\Delta$ 34<sup>His</sup>/Fc $\Delta$ 22-AU1 (NiVwt-LV) were used. Proteins were detected by chemiluminescence. Chemiluminescence values for the glycoprotein G variants were normalized to those of p24 (n=3; mean  $\pm$  standard error of the mean (SEM) are shown).
