# Supplementary material for: Receptor-Targeted Nipah Virus Glycoproteins Improve Cell-Type Selective Gene Delivery and Reveal a Preference for Membrane-Proximal Cell Attachment
Source: PubMed Central journal article supplement (PMC4900575; doi:10.1371/journal.ppat.1005641), 2016-06-09
Supplement: ppat.1005641.s005.pdf [file ppat.1005641.s005.pdf]

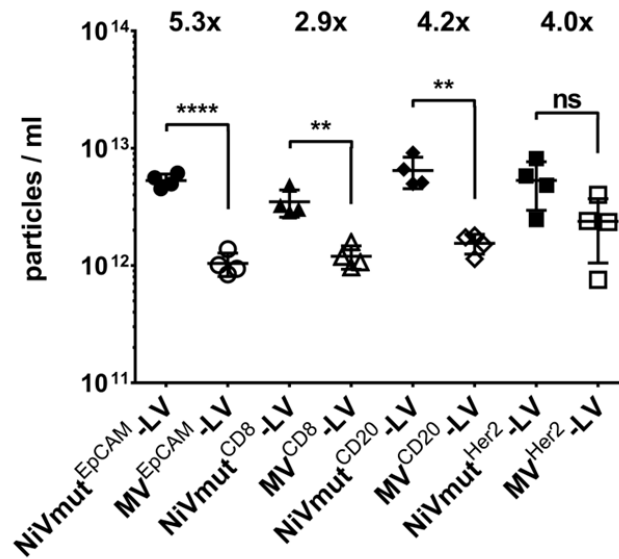

**Figure S5: Particle concentration of lentiviral vector stocks shown in Fig 5C.** The numbers of physical particles per ml were determined by single nanoparticle tracking analysis (NTA). The fold increase of particle numbers for the NiV-LV based stocks compared to the corresponding MV-LV based stocks are indicated. For each vector type mean values of four independently generated vector stocks are shown (n=4; mean  $\pm$  standard deviations (SD) are shown; \*\*, P<0.01; \*\*\*\*, P<0.0001; ns, not significant by unpaired *t*-test).
