# Supplementary material for: Receptor-Targeted Nipah Virus Glycoproteins Improve Cell-Type Selective Gene Delivery and Reveal a Preference for Membrane-Proximal Cell Attachment
Source: PubMed Central journal article supplement (PMC4900575; doi:10.1371/journal.ppat.1005641), 2016-06-09
Supplement: ppat.1005641.s006.pdf [file ppat.1005641.s006.pdf]

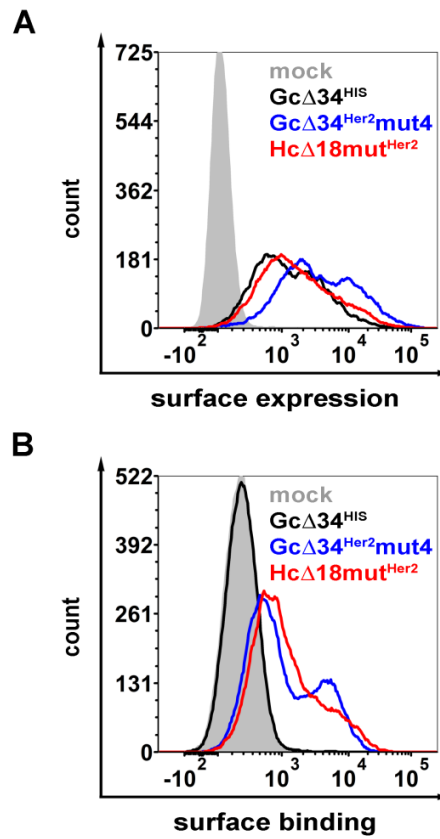

**Figure S6: Binding of recombinant Her2/neu. (A)** Exemplary flow cytometry blot of surface expression of NiV-GcΔ34<sup>Her2</sup>mut4 (blue line) and HcΔ18mut<sup>Her2</sup> (red line) in comparison to NiV-GcΔ34<sup>His</sup> (black line). HEK-293T cells were transiently transfected with plasmids encoding the different glycoproteins compared to mock transfected cells (filled curve) as determined by flow cytometry. Cells were stained with PE coupled anti-His antibody. One representative out of three experiments is shown. **(B)** NiV-GcΔ34<sup>Her2</sup>mut4 (blue line), HcΔ18mut<sup>Her2</sup> (red line) and NiV-GcΔ34<sup>His</sup> (black line) were expressed on HEK-293T cells, incubated for 1 h at 4°C with 1 μg/ml recombinant Fc-Her2/neu prior to staining against Fc-tag using FITC coupled anti-Fc antibody. Mock transfected cells (filled curve) served as control. One representative out of three experiments is shown.
