# Supplementary material for: Receptor-Targeted Nipah Virus Glycoproteins Improve Cell-Type Selective Gene Delivery and Reveal a Preference for Membrane-Proximal Cell Attachment
Source: PubMed Central journal article supplement (PMC4900575; doi:10.1371/journal.ppat.1005641), 2016-06-09
Supplement: ppat.1005641.s007.pdf [file ppat.1005641.s007.pdf]

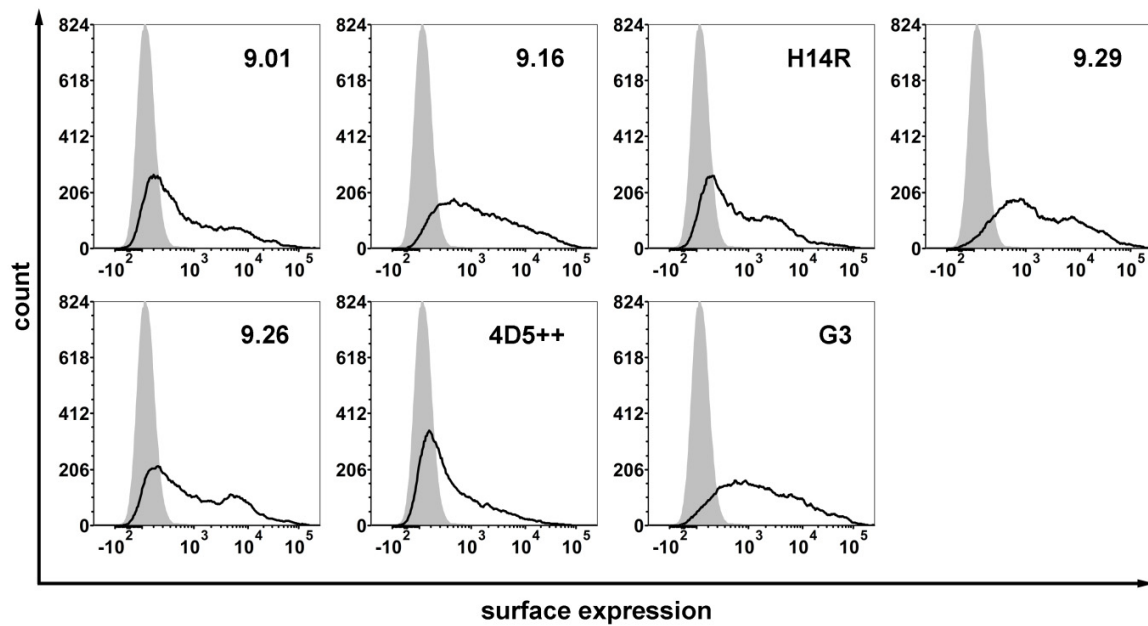

**Figure S7: Surface expression of Her2/*neu* DARPin displaying G proteins.**

Representative flow cytometry plots showing the cell surface expression of Gc $\Delta$ 34<sup>Her2</sup>mut4 variants fused to the indicated Her2/*neu*-specific DARPins (9.01, 9.16, H14R, 9.29, 9.26, G3) or the scFv 4D5++ after transient transfection of HEK-293T cells with the corresponding expression plasmids (empty curves) compared to mock transfected cells (filled curves). Cells were stained with PE-coupled anti-His antibody.
