# Supplementary material for: Receptor-Targeted Nipah Virus Glycoproteins Improve Cell-Type Selective Gene Delivery and Reveal a Preference for Membrane-Proximal Cell Attachment
Source: PubMed Central journal article supplement (PMC4900575; doi:10.1371/journal.ppat.1005641), 2016-06-09
Supplement: ppat.1005641.s008.pdf [file ppat.1005641.s008.pdf]

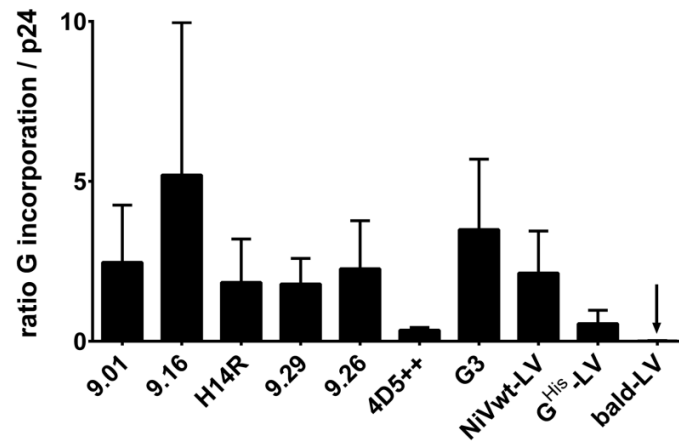

**Figure S8: Quantification of LV particle incorporation levels of Her2-targeted G protein variants.** The data refer to the exemplary Western blot shown in Fig 8G. Chemiluminescence values for the glycoprotein G variants and those of p24 were quantified from three Western blots and three independently generated vector stocks, respectively. Values for the G variants normalized to those of p24 are shown (n=3; mean  $\pm$  standard error of the mean (SEM) are shown).
