# Supplementary material for: Receptor-Targeted Nipah Virus Glycoproteins Improve Cell-Type Selective Gene Delivery and Reveal a Preference for Membrane-Proximal Cell Attachment
Source: PubMed Central journal article supplement (PMC4900575; doi:10.1371/journal.ppat.1005641), 2016-06-09
Supplement: ppat.1005641.s009.pdf [file ppat.1005641.s009.pdf]

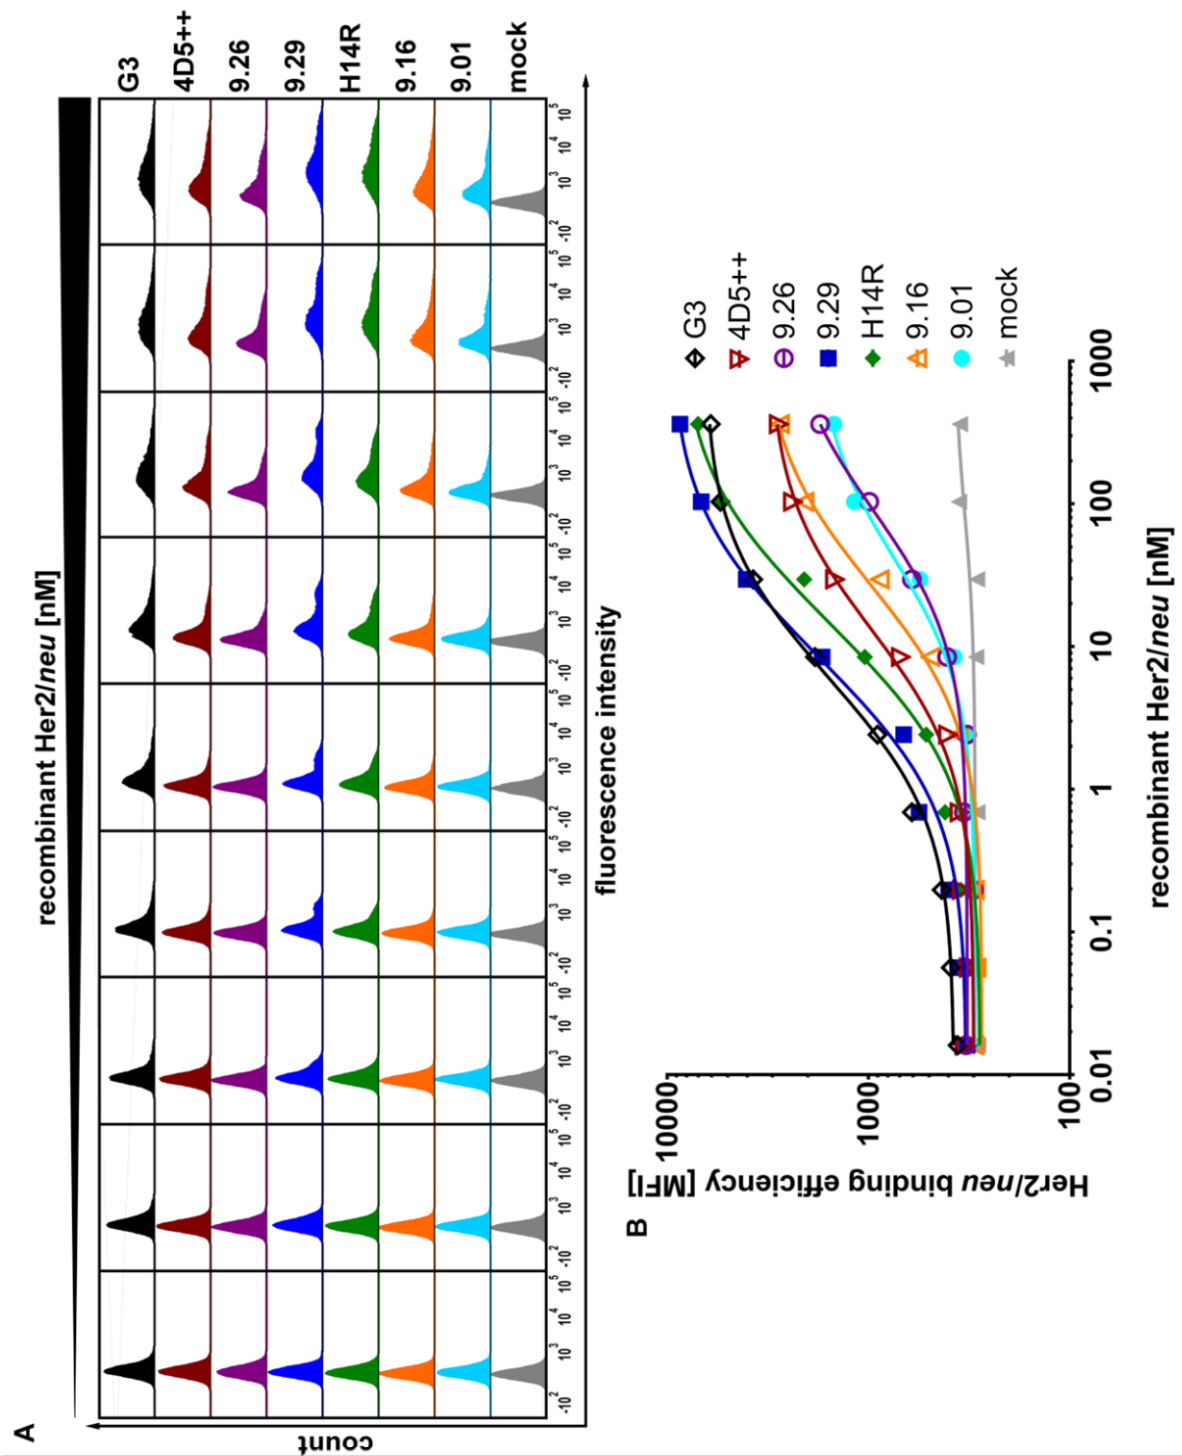

**Figure S9: Binding of recombinant Her2/neu to Gc $\Delta$ 34<sup>Her2</sup>mut4 variants.** (A) Flow cytometry plots obtained after transient transfection of HEK-293T cells with expression plasmids encoding Gc $\Delta$ 34<sup>Her2</sup>mut4 variants displaying either DARPin G3 (black), 9.26

(purple), 9.29 (blue), H14R (green), 9.16 (orange), 9.01 (cyan), or the scFv 4D5++ (red) and incubation for 1 h at 4°C with increasing molar concentrations of recombinant Fc-Her2/*neu* prior to staining against Fc-tag using FITC coupled anti-Fc antibody. Mock transfected cells were included as control (mock). **(B)** MFIs of the complete cell populations shown in **(A)** are plotted against the concentrations of recombinant Her2/*neu* applied for binding.
