# Supplementary material for: Receptor-Targeted Nipah Virus Glycoproteins Improve Cell-Type Selective Gene Delivery and Reveal a Preference for Membrane-Proximal Cell Attachment
Source: PubMed Central journal article supplement (PMC4900575; doi:10.1371/journal.ppat.1005641), 2016-06-09
Supplement: ppat.1005641.s011.pdf [file ppat.1005641.s011.pdf]

**Table S11: PCR primers for cloning**

| <b>Name</b>                              | <b>Sequence (5' – 3')</b>                                                                            |
|------------------------------------------|------------------------------------------------------------------------------------------------------|
| AgeI-DARPin fwd                          | ATA TAC CGG TGA CCT GGG TAA GAA ACT<br>GCT GGA AG                                                    |
| AgeI-DARPin-G3 fwd                       | ATA TAC CGG TGA CCT GGG TAA GAA ACT ACT<br>GGA AGC                                                   |
| AgeI-(G <sub>4</sub> S) <sub>3</sub> fwd | ATA TAC CGG TGG AGG TGG CTC TGG TG                                                                   |
| AgeI-NiV-G rev                           | ATA TAC CGG TGC ACT GCT CGG GGA TC                                                                   |
| AgeI-NiV-G(I588) rev                     | GGT CAC CGG TGC ACT GCT CGG GGA TCT<br>TCA CGG CGA ACA GCT TGG GCC TGG CCA<br>CGT TGT CGC CGG TAT CG |
| AgeI-scFv-CD20 fwd                       | ATA TAC CGG TAT GGC TCA GGT TCA GCT<br>GGTC                                                          |
| BamHI-cKIT fwd                           | ATA TGG ATC CAC CGG TCG CCA CCA TGA<br>GAG GCG CTC G                                                 |
| BamHI-ephrin-B2 fwd                      | TAT AGG ATC CGC CAC CAT GGC TGT GAG<br>AAG GGA CTC C                                                 |
| BamHI-GluA4 fwd                          | ATA TGG ATC CAC CGG TCG CCA CCA TGA<br>GGA TTA TTT GCA GG                                            |
| BsiWI-CD4-TM fwd                         | ATA TCG TAC GTC GGG ACA GGT CC                                                                       |
| cKIT-D3-BsiWI rev                        | ACC TCG TAC GTA CTA CTT CCA AGG TTG TTG                                                              |
| cKIT-Spel rev                            | GGT GTA CTA GTT CAG ACA TCG TCG TGC                                                                  |
| GluA4-Spel rev                           | CAG TAC TAG TTT ATG GTA GGT CCG ATG                                                                  |
| GluA4-ATD-BsiWI rev                      | GCC GCG TAC GCA TAT CTT GAA TCA AGA C                                                                |
| HIS-DARPin rev                           | GTG ATG GTG ATG GTG ATG AGA ACC TCT TG                                                               |
| NiV-F fwd                                | CGC GTT AAT TAA GCC ACC ATG GTA GTT ATA<br>C                                                         |
| NiV-Fc $\Delta$ 22-AU1 rev               | GTA CGA GCT CTT AGA TGT ACC TGT ACG TGT<br>CGG TGT TTC TCT TTT TCT CAA C                             |
| NiV-Fc $\Delta$ 25-AU1 rev               | ATA TGA GCT CTT AGA TGT ACC TGT ACG TGT<br>CCT TTT TCT CAA CAA TGA TAA AAC TGA TAA<br>ATG            |
| NiV-F-AU1 rev                            | GAT CGA GCT CTT AGA TGT ACC TGT ACG TGT<br>CTG TCC CAA TGT AGT AGA GAT C                             |
| NiV-G(E501+W504) fwd                     | CAA CAC CTG CCC CGC GAT CTG CGC GGA<br>GGG CGT GTA C                                                 |
| NiV-G(E501+W504) rev                     | GTA CAC GCC CTC CGC GCA GAT CGC GGG<br>GCA GGT GTT G                                                 |
| NiV-G(E501A) fwd                         | CAA CAC CTG CCC CGC GAT CTG CTG GGA GG                                                               |
| NiV-G(E501A) rev                         | CCT CCC AGC AGA TCG CGG GGC AGG TGT TG                                                               |
| NiV-G(E533A) fwd                         | CAA CCA GAC CGC CGC GAA TCC CGT GTT<br>CAC                                                           |

|                           |                                                                    |
|---------------------------|--------------------------------------------------------------------|
| NiV-G(E533A) rev          | GTG AAC ACG GGA TTC GCG GCG GTC TGG<br>TTG                         |
| NiV-G(Q530A+E533A)<br>fwd | CTG GAC TCC AAC GCG ACC GCC GCG AAT<br>CCC GTG TTC AC              |
| NiV-G(Q530A+E533A)<br>rev | GTG AAC ACG GGA TTC GCG GCG GTC GCG<br>TTG GAG TCC AG              |
| NiV-G(Q530A) fwd          | CTG GAC TCC AAC GCG ACC GCC GAG AAT<br>CCC                         |
| NiV-G(Q530A) rev          | GGG ATT CTC GGC GGT CGC GTT GGA GTC<br>CAG                         |
| NiV-G(W504A) fwd          | CGA GAT CTG CGC GGA GGG CGT GTA C                                  |
| NiV-G(W504A) rev          | GTA CAC GCC CTC CGC GCA GAT CTC G                                  |
| NiV-G(Y389A) fwd          | CCA TCA CCA AGT GCC AGG CCA GCA AGC<br>CCG AGA AC                  |
| NiV-G(Y389A) rev          | GTT CTC GGG CTT GCT GGC CTG GCA CTT<br>GGT GAT GG                  |
| NotI-DARPin rev           | ATA TGC GGC CGC ATT AAG CTT TTG C                                  |
| NotI-NiV-G rev            | ATA TGC GGC CGC GGT GCA CTG CTC GGG<br>GAT CTT CAC                 |
| NotI-scFv-CD20rev         | ATA TGC GGC CGC CTT CAG CTC CAG CTT<br>GGT CCC AGC AC              |
| PacI-NiV-GcΔ33            | GCA CTT AAT TAA GCC ACC ATG ATC AAG AAG<br>ATC AAC GAG GGC CTG CTG |
| PacI-NiV-GcΔ34            | GCA CTT AAT TAA GCC ACC ATG AAG AAG ATC<br>AAC GAG GGC CTG CTG     |
| SacI-NiV-FcΔ22            | GGC CGA GCT CTT AGG TGT TTC TCT TTT TCT<br>CAA CAA TG              |
| SacI-NiV-FcΔ25            | GGC CGA GCT CTT ACT TTT TCT CAA CAA TGA<br>TAA AAC TGA TAA ATG     |
| SacI-NiV-G rev            | ATA TGA GCT CTC AGG TGC ACT GCT CGG<br>GGA TC                      |
| SpeI-CD4-TM rev           | GCC GAC TAG TTC AAA TGG GGC TAC ATG                                |
| SpeI-ephrin-B2 rev        | ATA TAC TAG TTT AGA CCT TGT AGT AAA TGT<br>TCG CCG GGC TC          |
